# Supplementary material
Source: publisher figshare collection journal article supplement (https://frontiersin.figshare.com/ndownloader/files/15081722)
Supplement: Supplementary file [file 15081722]

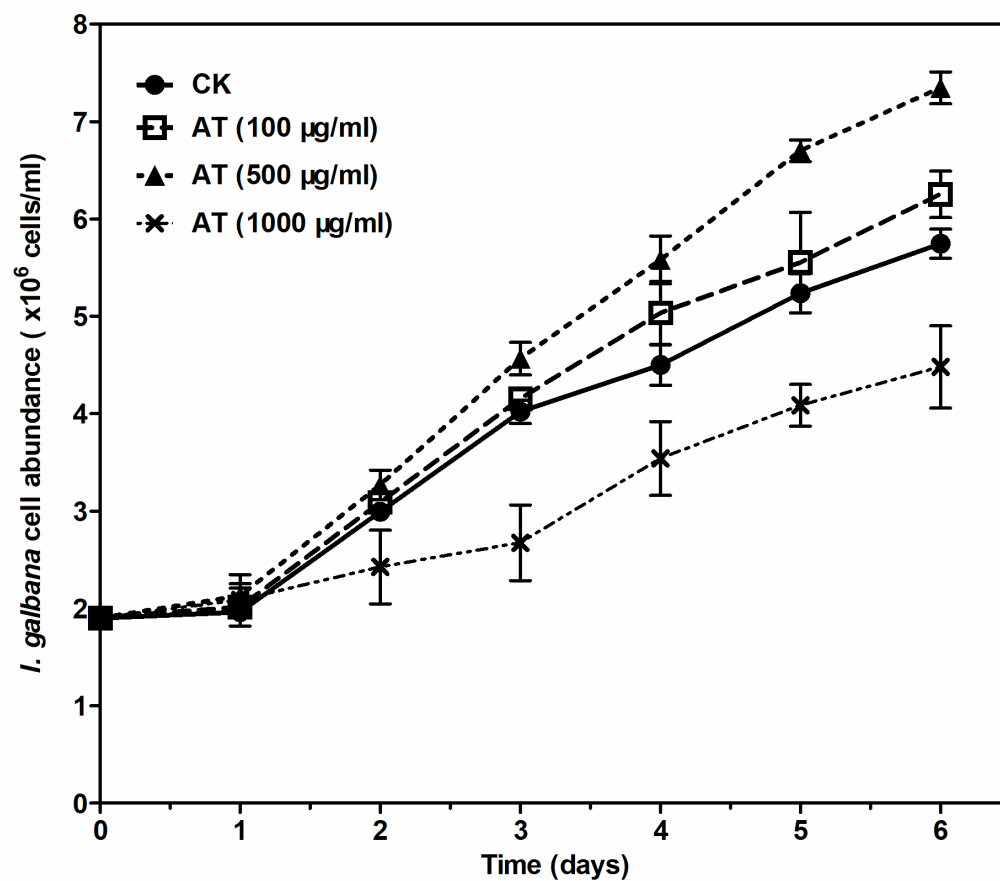

**Figure S4. Growth of *I. galbana* in the antibiotic-treated (AT) and untreated culture (CK) expressed as cell concentration.** Three concentration of ampicillin (100µg/ml, 500µg/ml and 1000 µg/ml) were used for antibiotic-treated groups. Error bars represent SE.
